# Supplementary material for: Beyond budgets: a qualitative study exploring how opportunity cost considerations shape schools’ decisions to adopt and implement interventions
Source: Research Square preprint supplement (doi:10.21203/rs.3.rs-8758562/v1), 2026-02-10
Supplement: Supplementary file 2 [file 73fb8fbb76a152bf98d6665c.docx]

Economic Evaluation of Passport to Success: semi-structured interview guide for teachers

## Rationale for Economic Evaluation Approach with teachers

This interview guide is structured to capture comprehensive data for economic evaluation of the Passport to Success program. The approach:

1. **Resource Use (Costs)**
   - Captures full range of resources beyond financial costs
   - Focuses on time as a key resource (teachers and TAs)
   - Documents both direct costs (materials) and indirect costs (preparation time)
   - Identifies displaced activities and opportunity costs
   - Explores variation in resource use across different contexts
2. **Benefits Assessment**
   - Examines immediate outputs (teaching delivery)
   - Explores intermediate outcomes (classroom behaviour)
   - Investigates broader impacts (school environment)
   - Documents unintended consequences (positive or negative)
   - Captures variation in benefits across different student groups
3. **Implementation Context**
   - Understands school decision-making processes
   - Identifies facilitators and barriers to implementation
   - Explores sustainability requirements
   - Documents adaptation and variation in delivery

This structure enables:

- Micro-costing of intervention delivery
- Understanding of resource allocation decisions
- Documentation of implementation strategies
- Assessment of cost-effectiveness from school perspective

# Semi-Structured Interview Guide: Passport to Success Evaluation

## Introduction (2 mins)

Your school was part of the Passport to Success trial carried out by The University of Manchester. To assess whether Passport is an initiative worth delivering in schools compared to other SEL interventions, or what your school is already doing, we want to know about the broad benefits and costs of delivering a programme. We also want to understand how these compare to what you normally do.

As part of the trial, the University supported schools with training, materials, and supply costs. We want to understand the true cost for schools of delivering such a programme outside of a trial. We’re interested in a broad perspective of costs, including your time for preparation and delivery compared to other SEL approaches, as well as your teaching assistant’s time.

Similarly, we want to understand what benefits you’ve observed, whether in terms of preparation efficiency, classroom behavior, or other outcomes that you think are important to talk about. The purpose of this interview is to understand the resources used, how this compares to usual practice, and to understand the benefits relative to current approaches.

This interview focuses on your thoughts, attitudes, and experiences with Passport. There are no right or wrong answers, and you can end the interview at any time.

Do you have any questions you would like to ask me before we begin? Are you happy to proceed with this interview?

*Total time: 45 minutes*

| Section | Time | Priority | Primary Question | Follow-up Questions/Probes | Rationale |
| --- | --- | --- | --- | --- | --- |
| **Opening Questions** |  |  |  |  |  |
| Role and Experience | 3 mins | HIGH | Could you briefly tell me about your role in the school?  Could you briefly tell me your experience with teaching social and emotional learning? | - What SEL approaches have you used before Passport? | Establishes baseline for comparing resource use and effectiveness. |
| **Resource Requirements (Costs)** |  |  |  |  |  |
| Teacher Time Investment | 8 mins | HIGH | We are now going to talk about Passport.  Could you walk me through everything you would do to prepare for and deliver Passport lessons?  What would be displaced to include Passport in the curriculum? | - How much time do you typically spend on:  • Lesson planning  • Resource preparation  • Meetings or training  - How does this compare to your usual SEL teaching preparation? | Critical for micro-costing analysis. Teacher time is a key resource in intervention delivery. |
| Teaching Assistant Role | 7 mins | HIGH | Could you describe how your teaching assistant(s) are involved with Passport? | - What tasks do they typically do for Passport lessons? *Probe for: Resource preparation, classroom support*  - Has this changed their usual role (from what they usually do)? How?  - How much time would they typically spend on Passport-related tasks? | Captures full staff resource use and opportunity costs. |
| Physical Resources & Training | 5 mins | MEDIUM | What physical resources did you need to deliver Passport effectively?  What training did you need to deliver Passport effectively? | - What materials did you use?  - How prepared did you feel after the training?  - Did you receive ongoing support?  Would that have been helpful? | Combines physical resources and training sections to capture direct costs and support needs efficiently. |
| **Benefits and Impact** |  |  |  |  |  |
| Teaching Benefits | 5 mins | HIGH | How has using Passport affected your teaching experience? | - Has it changed how you prepare or deliver lessons?  - Has it affected how you manage your classroom? | Documents potential efficiency gains or losses in teaching practice. |
| Student Impact | 7 mins | HIGH | What changes, if any, did you noticed in your students during or after Passport? | - Could you give some specific examples?  - How do these changes compare to what you’ve seen with other SEL approaches? | Captures key outcome measures and potential mechanisms of impact. |
| Classroom Dynamics | 5 mins | HIGH | How did Passport work with different groups of students in your class? | - How do different ability levels engage with the material?  - How has it affected group dynamics? | Helps understand variation in implementation costs and benefits across different student groups. |
| **Overall Assessment** |  |  |  |  |  |
| Cost-Benefit Analysis | 5 mins | HIGH | Thinking about everything we’ve discussed - the time and resources involved in delivering Passport, and the benefits - how would you evaluate Passport overall?  Do you think the costs of delivering Passport are worth the benefits? | - What aspects feel most worthwhile?  - What aspects feel most challenging?  - Would you recommend Passport to colleagues? | Captures teachers’ overall assessment of value for money. |
| Implementation & Sustainability | 3 mins | MEDIUM | If your school was to continue using Passport in the long-term, what would you need to continue delivering it successfully? | - What concerns would you have about continuing with it? | Identifies barriers and facilitators for sustained implementation. |
| Closing | 2 mins | MEDIUM | Is there anything else about your experience with Passport that you’d like to share? | - Do you have any questions for me? | Allows for capture of additional costs or benefits. |
