# Supplementary material for: Beyond budgets: a qualitative study exploring how opportunity cost considerations shape schools’ decisions to adopt and implement interventions
Source: Research Square preprint supplement (doi:10.21203/rs.3.rs-8758562/v1), 2026-02-10
Supplement: Supplementary file 3 [file 8842ad60a03ac11413e19b1e.docx]

Economic Evaluation of Passport to Success: semi-structured interview guide for Senior Leadership

## Rationale for Economic Evaluation Approach with Senior Leaders

This interview guide is structured to capture comprehensive data on how school senior leaders evaluate the economic and educational value of the Passport to Success program. The approach:

1. **Strategic Resource Allocation (Costs)**
   - Examines how school leaders make decisions about resource allocation
   - Explores the full range of implementation costs from a leadership perspective
   - Investigates staffing implications, including training, cover, and workload
   - Documents financial sustainability considerations
   - Assesses opportunity costs against other potential interventions
2. **Measurable Impact Assessment (Benefits)**
   - Focuses on key metrics of interest to school leaders (attendance, behavior, etc.)
   - Examines impact on whole-school culture and environment
   - Investigates alignment with school improvement priorities
   - Documents impact on staff wellbeing and retention
   - Explores perceived value for money from leadership perspective
3. **Implementation Strategy**
   - Explores decision-making processes for SEMH intervention adoption
   - Identifies preferred implementation models (whole-school vs. targeted)
   - Examines barriers to effective implementation
   - Assesses monitoring and evaluation approaches at leadership level
   - Investigates sustainability planning and long-term integration strategies

This structure enables:

- Understanding of school-level resource allocation decisions
- Assessment of intervention value from a strategic leadership perspective
- Documentation of how impact is measured and evaluated by school leaders
- Identification of key success factors for sustainable implementation
- Comparison with other potential interventions in terms of return on investment

# Semi-Structured Interview Guide: Passport to Success Evaluation

## Introduction (2 mins)

Your school was part of the Passport to Success trial carried out by The University of Manchester. As a senior leader, your perspective on whether interventions like Passport represent good value is crucial. We’re interested in understanding how you evaluate the costs and benefits of such programs, how you make implementation decisions, and how you measure their impact.

During the trial, the University financially supported schools for delivery of Passport, which included training, materials, and cover costs. We want to understand the true cost for schools of delivering such programs when external funding isn’t available, and how these costs factor into your decision-making processes.

We’re also particularly interested in how you measure and evaluate the impact of SEMH interventions - whether that’s through attendance data, behavior incidents, suspensions, staff feedback, or other metrics that are meaningful to your school improvement priorities.

This interview is designed to capture your unique leadership perspective on the economic and educational value of interventions like Passport, including implementation challenges, resource implications, and how you determine whether such investments deliver worthwhile returns for your school community.

*Total time: 45 minutes*

| Section | Time | Priority | Primary Question | Follow-up Questions/Probes | Rationale |
| --- | --- | --- | --- | --- | --- |
| **Strategic Context & Decision-Making** |  |  |  |  |  |
| Leadership Role & School Context | 3 mins | HIGH | Could you tell me about your role and your school’s approach to social and emotional learning? | - How do SEMH interventions fit within your school improvement priorities?  - What challenges does your school face in this area? | Establishes context for understanding resource allocation decisions and strategic priorities. |
| Resource Allocation Process | 5 mins | HIGH | Could you walk me through how your school makes decisions about investing in new interventions like Passport? | - Who is involved in these decisions?  - What factors weigh most heavily in your decision-making?  - *Probe for: Budget constraints, evidence requirements, alignment with priorities* | Reveals leadership perspective on resource allocation and opportunity costs. |
| **Implementation Costs & Considerations** |  |  |  |  |  |
| Staffing Implications | 6 mins | HIGH | What are the main staffing considerations when implementing a program like Passport? | - How do you manage training requirements?  - What is your approach to the ‘train the trainer’ model versus external delivery?  - *Probe for: Cover arrangements, workload implications* | Captures leadership perspective on key resource constraints and staffing strategies. |
| Implementation Barriers | 5 mins | HIGH | What are the main barriers you’ve encountered when implementing SEMH interventions like Passport? | - How have you addressed these challenges?  - *Probe for: Timetabling, staff buy-in, resource constraints* | Identifies practical implementation challenges that affect cost-effectiveness. |
| **Impact Assessment & Value** |  |  |  |  |  |
| Key Performance Indicators | 7 mins | HIGH | How do you measure the success of SEMH interventions in your school? | - What specific metrics do you track (attendance, behavior logs, suspensions)?  - Do you use formal assessment tools like Boxall profiles?  - *Probe for: Data systems, frequency of monitoring* | Captures leadership approach to impact evaluation. Critical for understanding how value is assessed. |
| Whole-School Impact | 5 mins | HIGH | What whole-school effects have you observed from implementing Passport or similar interventions? | - How has it affected school culture?  - Has it influenced wider educational outcomes?  - *Probe for: Staff wellbeing, school climate* | Documents broader strategic benefits beyond targeted metrics. |
| **Strategic Implementation** |  |  |  |  |  |
| Implementation Model | 5 mins | HIGH | What implementation approach works best for your school when adopting programs like Passport? | - Do you prefer whole-school or targeted approaches?  - Have you explored collaborative approaches with other schools to share costs?  - *Probe for: Trust-wide approaches, phased implementation* | Captures strategic implementation decisions that affect both costs and outcomes. |
| **Overall Value Assessment** |  |  |  |  |  |
| Leadership Value Judgment | 5 mins | HIGH | Overall, from a leadership perspective, what value do you believe Passport provides to your school? | - Would you recommend it to other school leaders? Why or why not?  - How do you communicate its value to governors, staff, and parents?  - *Probe for: Key selling points, value for money assessment* | Captures overall leadership assessment of intervention value. |
| Future Investment | 2 mins | MEDIUM | What would influence your decision to invest in Passport or similar interventions in the future? | - What evidence would be most persuasive?  - What cost structures would be most sustainable? | Identifies key factors that influence future investment decisions. |
| Closing | 2 mins | MEDIUM | Is there anything else about the value or implementation of Passport that you think is important from a leadership perspective? | - Do you have any questions for me? | Allows for capture of additional strategic considerations. |
